# Supplementary material for: Clinical Relevance of Targeted Therapy and Immune-Checkpoint Inhibition in Lung Cancer
Source: MDPI journal article supplement (doi:10.3390/pharmaceutics15041252), 2023-04-16
Supplement: s1 [file s1]

**Supplementary Table S4.** Ongoing clinical studies on microbiota modulating drugs in combination with LC therapy registered at clinicaltrials.gov

| Study ID    | Status | Conditions                    | Interventions                                                                             | Phase | Enrollment | Start Date |
|-------------|--------|-------------------------------|-------------------------------------------------------------------------------------------|-------|------------|------------|
| NCT02771470 | C      | LC                            | Probiotic ( <i>Clostridium butyricum</i> );<br>Chemotherapy                               | I     | 41         | 2014       |
| NCT03775850 | O      | Cancer; NSCLC                 | EDP1503 ( <i>Bifidobacterium animalis lactis</i> ); Pembrolizumab                         | I; II | 120        | 2018       |
| NCT04009122 | O      | M NSCLC                       | IGEN0206 (Nutrient); standard of care                                                     | NA    | 280        | 2019       |
| NCT03637803 | O      | Solid cancer; Melanoma; NSCLC | MRx0518 (live biotherapeutic product); Pembrolizumab                                      | I; II | 132        | 2019       |
| NCT04601402 | O      | Solid cancer; NSCLC; SqCC     | GEN-001 (live biotherapeutic product); Avelumab                                           | I     | 93         | 2020       |
| NCT04521075 | O NR   | A Melanoma; A NSCLC           | FMT; Nivolumab                                                                            | I; II | 50         | 2020       |
| NCT04924374 | O NR   | LC                            | FMT; anti-PD-1                                                                            | NA    | 20         | 2021       |
| NCT04105270 | O NR   | ADC; LC                       | Oral restorative microbiota therapy;<br>Durvalumab; Cisplatin;<br>Pemetrexed; Carboplatin | II    | 30         | 2021       |
| NCT03819296 | O      | Solid cancer; NSCLC           | FMT; Infliximab; Prednisone;<br>Vedolizumab                                               | I; II | 800        | 2021       |

*Abbreviations:* **C**, Closed; **O**, Open; **NR**, Not Recruiting; **NA**, Not Associated; **A**, Advanced; **M**, Metastatic; **R**, Recurrent; **LC**, Lung Cancer; **ADC**, Adenocarcinoma; **NSCLC**, Non-Small Cell Lung Cancer.
