# Supplementary material for: Clinical Relevance of Targeted Therapy and Immune-Checkpoint Inhibition in Lung Cancer
Source: MDPI journal article supplement (doi:10.3390/pharmaceutics15041252), 2023-04-16
Supplement: s1 [file s1]

**Supplementary Table S2.** Ongoing clinical studies on immune-checkpoint inhibitors registered at clinicaltrials.gov

| Target       | Study ID    | Status | Conditions                      | Interventions                                       | Phase | Enrollment | Start Date |
|--------------|-------------|--------|---------------------------------|-----------------------------------------------------|-------|------------|------------|
| CTLA-4       | NCT02221739 | C      | NSCLC                           | Ipilimumab; Radiation                               | I; II | 39         | 2014       |
| CTLA-4       | NCT04544644 | O; NR  | NSCLC                           | AK104; Anlotinib                                    | II    | 30         | 2020       |
| CTLA-4; PD-1 | NCT02785952 | O; NR  | R SqCC; A SqCC                  | Ipilimumab; Nivolumab                               | III   | 350        | 2015       |
| CTLA-4; PD-1 | NCT02696993 | O      | M NSCLC (BM); A NSCLC           | Ipilimumab; Nivolumab; Radiation                    | I; II | 88         | 2016       |
| CTLA-4; PD-1 | NCT03262779 | O      | Cancer; NSCLC                   | Ipilimumab; Nivolumab                               | II    | 50         | 2017       |
| CTLA-4; PD-1 | NCT03391869 | O      | ADC; NSCLC; A LC                | Ipilimumab; Nivolumab; Radiation                    | III   | 360        | 2017       |
| CTLA-4; PD-1 | NCT03377023 | O      | NSCLC; LC; M NSCLC              | Nivolumab; Ipilimumab; Nintedanib                   | I; II | 98         | 2018       |
| CTLA-4; PD-1 | NCT03430063 | O; NR  | A NSCLC                         | Cemiplimab; Ipilimumab                              | II    | 28         | 2018       |
| CTLA-4; PD-1 | NCT03468985 | O; NR  | M Non-SqCC; R Non-SqCC; A NSCLC | Cabozantinib; Ipilimumab; Nivolumab                 | II    | 169        | 2018       |
| CTLA-4; PD-1 | NCT03515629 | O; NR  | NSCLC                           | Cemiplimab; Chemotherapy; Pembrolizumab             | III   | 5          | 2018       |
| CTLA-4; PD-1 | NCT03516981 | O      | A NSCLC                         | Pembrolizumab; Favezelimab; Lenvatinib; Quavonlimab | II    | 318        | 2018       |
| CTLA-4; PD-1 | NCT03575793 | O      | LC; SCLC                        | Nivolumab; Plinabulin; Ipilimumab                   | I; II | 35         | 2018       |

|               |             |       |                                |                                                                                                |         |      |      |
|---------------|-------------|-------|--------------------------------|------------------------------------------------------------------------------------------------|---------|------|------|
| CTLA-4; PD-1  | NCT03581487 | O     | R NSCLC; A NSCLC               | Durvalumab; Selumetinib;<br>Tremelimumab                                                       | I; II   | 40   | 2019 |
| CTLA-4; PD-1  | NCT04013542 | O     | A NSCLC (ALK Mut;<br>EGFR Mut) | Ipilimumab; Nivolumab;<br>Radiation                                                            | I       | 20   | 2019 |
| CTLA-4; PD-1  | NCT04043195 | O     | A NSCLC                        | Nivolumab; Oxaliplatin;<br>Ipilimumab                                                          | I; II   | 30   | 2019 |
| CTLA-4; PD-1  | NCT04929041 | O; NR | A NSCLC                        | Carboplatin; Ipilimumab;<br>Paclitaxel; Nivolumab;<br>Pembrolizumab; Pemetrexed;<br>Radiation  | II; III | 100  | 2022 |
| CTLA4; PD-L1  | NCT03838848 | O     | A NSCLC                        | KN046                                                                                          | II      | 149  | 2019 |
| CTLA-4; PD-L1 | NCT02542293 | O; NR | NSCLC                          | Durvalumab; Tremelimumab;<br>Paclitaxel; Carboplatin;<br>Gemcitabine; Cisplatin;<br>Pemetrexed | III     | 953  | 2015 |
| CTLA-4; PD-L1 | NCT03164616 | O     | NSCLC                          | Durvalumab; Tremelimumab;<br>Abraxane; Carboplatin;<br>Gemcitabine; Cisplatin                  | III     | 1193 | 2017 |
| CTLA-4; PD-L1 | NCT03373760 | O; NR | R SqCC; A SqCC                 | Durvalumab; Tremelimumab                                                                       | II      | 132  | 2017 |
| CTLA-4; PD-L1 | NCT03275597 | O     | NSCLC; A NSCLC                 | Durvalumab; Tremelimumab;<br>Radiation                                                         | I       | 31   | 2018 |
| CTLA-4; PD-L1 | NCT03963414 | O     | SCLC                           | Durvalumab; Tremelimumab;<br>Carboplatin; Etoposide                                            | I       | 18   | 2020 |

|      |             |       |               |                                                                   |       |      |      |
|------|-------------|-------|---------------|-------------------------------------------------------------------|-------|------|------|
| PD-1 | NCT01928576 | O     | NSCLC         | Azacitidine; Entinostat;<br>Nivolumab                             | II    | 120  | 2013 |
| PD-1 | NCT02422381 | O; NR | Cancer; NSCLC | Pembrolizumab; Gemcitabine                                        | I; II | 16   | 2015 |
| PD-1 | NCT02439450 | O; NR | NSCLC         | Viagenpumatucl-L;<br>Nivolumab; Pembrolizumab;<br>Pemetrexed      | I; II | 121  | 2015 |
| PD-1 | NCT02504372 | O; NR | NSCLC         | Pembrolizumab                                                     | III   | 1177 | 2015 |
| PD-1 | NCT02546986 | O; NR | Cancer; NSCLC | Azacitidine; Pembrolizumab                                        | II    | 100  | 2015 |
| PD-1 | NCT02621398 | O; NR | NSCLC         | Radiation; Carboplatin;<br>Paclitaxel; Pembrolizumab              | I     | 30   | 2016 |
| PD-1 | NCT02733159 | O; NR | Cancer; NSCLC | Pembrolizumab                                                     | II    | 62   | 2016 |
| PD-1 | NCT02840994 | C     | NSCLC         | BN-CV301; Pembrolizumab;<br>Nivolumab                             | I     | 24   | 2016 |
| PD-1 | NCT02864394 | O; NR | Cancer; NSCLC | Pembrolizumab; Docetaxel                                          | III   | 425  | 2016 |
| PD-1 | NCT03003468 | O; NR | NSCLC         | Imprime PGG; Pembrolizumab                                        | I; II | 35   | 2016 |
| PD-1 | NCT03360630 | O     | LC; Cancer    | Anti-PD-1; DC-CIK                                                 | I; II | 60   | 2016 |
| PD-1 | NCT02818920 | O; NR | NSCLC         | Pembrolizumab                                                     | II    | 35   | 2017 |
| PD-1 | NCT02824965 | O; NR | NSCLC         | Pembrolizumab; Coxsackievirus<br>A21                              | I     | 11   | 2017 |
| PD-1 | NCT02934503 | C     | SCLC          | Pembrolizumab; Cisplatin;<br>Carboplatin; Etoposide;<br>Radiation | II    | 5    | 2017 |

|      |             |       |                  |                                             |         |     |      |
|------|-------------|-------|------------------|---------------------------------------------|---------|-----|------|
| PD-1 | NCT02938624 | O     | E NSCLC          | Pembrolizumab                               | I       | 28  | 2017 |
| PD-1 | NCT03048500 | O; NR | R NSCLC; A NSCLC | Metformin; Nivolumab                        | II      | 17  | 2017 |
| PD-1 | NCT03083808 | O; NR | NSCLC            | Pembrolizumab                               | II      | 35  | 2017 |
| PD-1 | NCT03150875 | O; NR | NSCLC            | Sintilimab; Docetaxel                       | III     | 290 | 2017 |
| PD-1 | NCT03181308 | C     | Cancer; NSCLC    | Carotuximab; Nivolumab                      | I       | 11  | 2017 |
| PD-1 | NCT03288870 | O; NR | A NSCLC          | BCD-100; Docetaxel                          | II; III | 218 | 2017 |
| PD-1 | NCT03301688 | C     | NSCLC            | Toripalimab                                 | I       | 38  | 2017 |
| PD-1 | NCT03307759 | O; NR | NSCLC            | Pembrolizumab; Radiation                    | I       | 13  | 2017 |
| PD-1 | NCT03308942 | O; NR | Cancer           | Niraparib; Pembrolizumab;<br>Dostarlimab    | II      | 53  | 2017 |
| PD-1 | NCT03322540 | C     | LC               | Pembrolizumab; Epacadostat                  | II      | 154 | 2017 |
| PD-1 | NCT03326752 | C     | A NSCLC          | DV281; Anti-PD-1                            | I       | 26  | 2017 |
| PD-1 | NCT03358875 | O; NR | NSCLC            | Tislelizumab; Docetaxel                     | III     | 805 | 2017 |
| PD-1 | NCT03875092 | O; NR | NSCLC            | Pembrolizumab; Paclitaxel;<br>Carboplatin   | III     | 125 | 2017 |
| PD-1 | NCT03322566 | C     | LC               | Pembrolizumab; Epacadostat;<br>Chemotherapy | II      | 233 | 2018 |
| PD-1 | NCT03383302 | O     | E NSCLC          | Radiation; Nivolumab                        | I; II   | 31  | 2018 |
| PD-1 | NCT03409614 | O; NR | NSCLC            | REGN2810; Chemotherapy                      | III     | 790 | 2018 |
| PD-1 | NCT03436056 | O; NR | M NSCLC          | Radiation; Pembrolizumab                    | I       | 24  | 2018 |
| PD-1 | NCT03513666 | O; NR | NSCLC            | Toripalimab; Pemetrexed;<br>Carboplatin     | II      | 40  | 2018 |

|      |             |       |               |                                                                                |       |     |      |
|------|-------------|-------|---------------|--------------------------------------------------------------------------------|-------|-----|------|
| PD-1 | NCT03526887 | O     | LC            | Pembrolizumab                                                                  | II    | 110 | 2018 |
| PD-1 | NCT03557411 | O     | NSCLC         | Camrelizumab                                                                   | II    | 42  | 2018 |
| PD-1 | NCT03562871 | O; NR | NSCLC         | IO102; Pembrolizumab;<br>Carboplatin; Pemetrexed                               | I; II | 108 | 2018 |
| PD-1 | NCT03631784 | O; NR | NSCLC         | Pembrolizumab; Paclitaxel;<br>Carboplatin; Cisplatin;<br>Pemetrexed; Radiation | II    | 216 | 2018 |
| PD-1 | NCT03656094 | O     | M NSCLC       | Pembrolizumab; Chemotherapy                                                    | II    | 98  | 2018 |
| PD-1 | NCT03666728 | T     | LC            | Camrelizumab; Bevacizumab                                                      | II    | 5   | 2018 |
| PD-1 | NCT03663205 | O; NR | NSCLC         | Tislelizumab; Cisplatin;<br>Carboplatin;Pemetrexed                             | III   | 334 | 2018 |
| PD-1 | NCT03668496 | O; NR | SqCC; A LC    | Camrelizumab                                                                   | III   | 390 | 2018 |
| PD-1 | NCT03693326 | O     | Cancer; M LC  | PDR001                                                                         | II    | 70  | 2018 |
| PD-1 | NCT03709706 | O     | Cancer        | Letetresgene autoleucel;<br>Pembrolizumab                                      | I; II | 54  | 2018 |
| PD-1 | NCT03866980 | O     | A NSCLC       | AK105; Carboplatin;<br>Pemetrexed                                              | III   | 360 | 2018 |
| PD-1 | NCT03866993 | O     | A NSCLC; SqCC | AK105; Paclitaxel; Carboplatin                                                 | III   | 338 | 2018 |
| PD-1 | NCT04731909 | O     | ES-SCLC       | Toripalimab; Anlotinib;<br>Cisplatin; Carboplatin                              | NA    | 80  | 2018 |
| PD-1 | NCT03623776 | O; NR | NSCLC         | JS001; Pemetrexed; Carboplatin                                                 | II    | 80  | 2019 |

|      |             |       |                               |                                                                          |       |     |      |
|------|-------------|-------|-------------------------------|--------------------------------------------------------------------------|-------|-----|------|
| PD-1 | NCT03774732 | O     | NSCLC; M NSCLC                | Radiation; Pembrolizumab;<br>Chemotherapy                                | III   | 460 | 2019 |
| PD-1 | NCT03802240 | O     | Non-SqCC                      | Sintilimab; Bevacizumab;<br>Pemetrexed; Cisplatin                        | III   | 600 | 2019 |
| PD-1 | NCT03808480 | O     | NSCLC                         | Chemotherapy; Nivolumab                                                  | II    | 22  | 2019 |
| PD-1 | NCT03829319 | O; NR | Non-SqCC                      | Pembrolizumab; Carboplatin;<br>Cisplatin; Pemetrexed;<br>Lenvatinib      | III   | 726 | 2019 |
| PD-1 | NCT03829332 | O; NR | NSCLC                         | Pembrolizumab; Lenvatinib                                                | III   | 620 | 2019 |
| PD-1 | NCT03846310 | O     | NSCLC; Non-SqCC<br>(EGFR Mut) | Etrumadenant; Zimberelimab;<br>Carboplatin; Pemetrexed;<br>Pembrolizumab | I     | 116 | 2019 |
| PD-1 | NCT03903887 | O     | NSCLC                         | Anti-PD1-activated TILs                                                  | I; II | 20  | 2019 |
| PD-1 | NCT03912389 | O     | Non-SqCC                      | BCD-100; Pemetrexed;<br>Cisplatin; Carboplatin                           | III   | 292 | 2019 |
| PD-1 | NCT03952403 | O     | Cancer; NSCLC                 | HLX10; Bevacizumab;<br>Carboplatin; Pemetrexed                           | III   | 636 | 2019 |
| PD-1 | NCT03976323 | O; NR | Cancer; Non-sqCC              | Pembrolizumab; Pemetrexed;<br>Carboplatin; Cisplatin; Olaparib           | III   | 792 | 2019 |
| PD-1 | NCT03976362 | O     | Cancer; SqCC;<br>NSCLC        | Pembrolizumab; Carboplatin;<br>Paclitaxel; Olaparib                      | III   | 735 | 2019 |
| PD-1 | NCT03991819 | O     | NSCLC                         | Binimetinib; Pembrolizumab                                               | I     | 40  | 2019 |

|      |             |       |                        |                                                                           |       |     |      |
|------|-------------|-------|------------------------|---------------------------------------------------------------------------|-------|-----|------|
| PD-1 | NCT03994744 | O     | SCLC; R SCLC; ES-SCLC  | anti-PD-1; Metformin                                                      | II    | 68  | 2019 |
| PD-1 | NCT04033354 | O     | SqCC                   | HLX10; Carboplatin; Paclitaxel                                            | III   | 516 | 2019 |
| PD-1 | NCT04047186 | O; NR | E NSCLC                | Nivolumab                                                                 | II    | 50  | 2019 |
| PD-1 | NCT04055792 | O     | SCLC                   | Sintilimab; Anlotinib                                                     | II    | 52  | 2019 |
| PD-1 | NCT04059874 | O     | NSCLC                  | Anti-PD-1; Donafenib                                                      | I     | 20  | 2019 |
| PD-1 | NCT04063163 | O     | ES-SCLC                | HLX10; Carboplatin; Etoposide                                             | III   | 567 | 2019 |
| PD-1 | NCT04063449 | O     | Non-sqCC               | Endostar; anti-PD-1                                                       | NA    | 170 | 2019 |
| PD-1 | NCT04108013 | O; NR | LC; NSCLC              | Camrelizumab; Carboplatin; Paclitaxel                                     | II    | 38  | 2019 |
| PD-1 | NCT04124731 | O; NR | Cancer; NSCLC          | Sintilimab; Anlotinib; Chemotherapy                                       | II    | 98  | 2019 |
| PD-1 | NCT04133337 | O; NR | Thoracic cancer; NSCLC | Apatinib; Camrelizumab                                                    | I; II | 20  | 2019 |
| PD-1 | NCT04144608 | O     | A NSCLC                | Treprilumab; Chemotherapy                                                 | II    | 30  | 2019 |
| PD-1 | NCT04165070 | O     | Cancer; NSCLC          | Pembrolizumab; Carboplatin; Paclitaxel; Pemetrexed; Vibostolimab; MK-5890 | II    | 180 | 2019 |
| PD-1 | NCT04171284 | O; NR | SqCC                   | SCT-I10; Docetaxel;                                                       | III   | 360 | 2019 |
| PD-1 | NCT04303130 | O     | NSCLC                  | Camrelizumab                                                              | II    | 52  | 2019 |
| PD-1 | NCT04676412 | O     | NSCLC                  | Pembrolizumab; Lenvatinib                                                 | III   | 620 | 2019 |

|      |             |       |                              |                                                                                |     |     |      |
|------|-------------|-------|------------------------------|--------------------------------------------------------------------------------|-----|-----|------|
| PD-1 | NCT04716933 | O     | Non-SqCC                     | Pembrolizumab; Carboplatin;<br>Cisplatin; Pemetrexed;<br>Lenvatinib            | III | 200 | 2019 |
| PD-1 | NCT04165083 | O     | Cancer; NSCLC                | Pembrolizumab; MK-4830                                                         | II  | 60  | 2020 |
| PD-1 | NCT04165096 | O; NR | Cancer; NSCLC                | Pembrolizumab; MK-5890;<br>MK-4830; Diphenhydramine;<br>Acetaminophen; MK-0482 | II  | 135 | 2020 |
| PD-1 | NCT04173325 | O     | SCLC                         | Nivolumab; Irinotecan                                                          | I   | 10  | 2020 |
| PD-1 | NCT04189094 | O; NR | SCLC                         | Sintilimab; Etoposide;<br>Cisplatin; Radiation                                 | II  | 140 | 2020 |
| PD-1 | NCT04205812 | O     | M SqCC; M Non-SqCC           | Retifanlimab; Pemetrexed;<br>Cisplatin; Carboplatin;<br>Paclitaxel             | III | 530 | 2020 |
| PD-1 | NCT04252365 | O; NR | NSCLC                        | Sintilimab; Pembrolizumab                                                      | II  | 20  | 2020 |
| PD-1 | NCT04331626 | O; NR | M NSCLC                      | Nivolumab; Gemcitabine                                                         | IV  | 50  | 2020 |
| PD-1 | NCT04340882 | O     | M NSCLC; R NSCLC;<br>A NSCLC | Docetaxel; Pembrolizumab;<br>Ramucirumab                                       | II  | 41  | 2020 |
| PD-1 | NCT04379635 | O     | NSCLC                        | Tislelizumab; Cisplatin;<br>Paclitaxel; Pemetrexed;<br>Carboplatin             | III | 380 | 2020 |
| PD-1 | NCT04396457 | O     | Non-SqCC; LC                 | Pembrolizumab; Pemetrexed                                                      | II  | 50  | 2020 |



|      |             |       |                          |                                                                           |       |     |      |
|------|-------------|-------|--------------------------|---------------------------------------------------------------------------|-------|-----|------|
| PD-1 | NCT04405674 | O     | NSCLC                    | Tislelizumab; Carboplatin;<br>Pemetrexed                                  | II    | 66  | 2020 |
| PD-1 | NCT04422392 | O     | NSCLC                    | Carboplatin; Pemetrexed;<br>anti-PD-1                                     | II    | 107 | 2020 |
| PD-1 | NCT04453930 | O     | SCLC                     | Camrelizumab; Platinum;<br>Irinotecan; Apatinib                           | II    | 60  | 2020 |
| PD-1 | NCT04459078 | O; NR | ADC                      | Camrelizumab; Paclitaxel;<br>Apatinib                                     | II    | 63  | 2020 |
| PD-1 | NCT04459611 | O     | NSCLC                    | Sintilimab; Pemetrexed;<br>Carboplatin; Paclitaxel                        | II    | 60  | 2020 |
| PD-1 | NCT04490421 | O     | LC; SCLC                 | Camrelizumab; Apatinib;<br>Etoposide; Cisplatin                           | III   | 45  | 2020 |
| PD-1 | NCT04506242 | O; NR | NSCLC                    | Camrelizumab; Apatinib                                                    | II    | 74  | 2020 |
| PD-1 | NCT04507217 | O; NR | A NSCLC; M NSCLC<br>(BM) | Tislelizumab; Carboplatin;<br>Pemetrexed                                  | II    | 78  | 2020 |
| PD-1 | NCT04530227 | O     | E NSCLC                  | Camrelizumab; Pemetrexed;<br>Paclitaxel                                   | II    | 30  | 2020 |
| PD-1 | NCT04549025 | O     | NSCLC                    | JTX-4014; Vopratelimab                                                    | II    | 75  | 2020 |
| PD-1 | NCT04585815 | O     | Cancer; NSCLC            | Sasanlimab; Encorafenib;<br>Binimetinib; Sasanlimab;<br>Axitinib; SEA-TGT | I; II | 375 | 2020 |
| PD-1 | NCT04612673 | O; NR | NSCLC                    | Sintilimab                                                                | II    | 33  | 2020 |

|      |             |       |            |                                                                 |         |     |      |
|------|-------------|-------|------------|-----------------------------------------------------------------|---------|-----|------|
| PD-1 | NCT04613804 | O; NR | A NSCLC    | Toripalimab                                                     | II      | 30  | 2020 |
| PD-1 | NCT04620837 | O     | SCLC       | Tislelizumab; Anlotinib                                         | II      | 25  | 2020 |
| PD-1 | NCT04624204 | O     | SCLC       | Pembrolizumab; Olaparib;<br>Etoposide; Platinum; Radiation      | III     | 672 | 2020 |
| PD-1 | NCT04691388 | O     | NSCLC      | Amlotinib; Sindilumab                                           | II      | 27  | 2020 |
| PD-1 | NCT04750083 | O     | Non-SqCC   | HX008; Pembrolizumab;<br>Pemetrexed; Cisplatin;<br>Carboplatin  | II; III | 700 | 2020 |
| PD-1 | NCT04865705 | O; NR | NSCLC      | Tislelizumab                                                    | II      | 33  | 2020 |
| PD-1 | NCT04941417 | O     | NSCLC      | Anti-PD-1                                                       | II      | 60  | 2020 |
| PD-1 | NCT04542369 | O; NR | SCLC       | Tislelizumab; Cisplatin;<br>Etoposide                           | II      | 15  | 2021 |
| PD-1 | NCT04670913 | O     | A Non-SqCC | Camrelizumab; Apatinib                                          | II      | 30  | 2021 |
| PD-1 | NCT04681131 | O     | NSCLC      | CAB-AXL-ADC; anti-PD-1                                          | II      | 240 | 2021 |
| PD-1 | NCT04683198 | O; NR | SCLC       | Camrelizumab; Apatinib;<br>Carboplatin; Etoposide               | II      | 69  | 2021 |
| PD-1 | NCT04725188 | O     | M NSCLC    | Pembrolizumab; Vibostolimab;<br>Docetaxel                       | II      | 240 | 2021 |
| PD-1 | NCT04728724 | O; NR | NSCLC      | Sintilimab; Chemotherapy                                        | II      | 100 | 2021 |
| PD-1 | NCT04736823 | O     | NSCLC      | AK112; Pemetrexed; Paclitaxel;<br>Carboplatin; Docetaxel; AK105 | II      | 206 | 2021 |

|      |             |       |         |                                                                                         |       |     |      |
|------|-------------|-------|---------|-----------------------------------------------------------------------------------------|-------|-----|------|
| PD-1 | NCT04749394 | O; NR | A NSCLC | Camrelizumab; anti-PD-1;<br>Apatinib; anti-VEGFR2                                       | II    | 42  | 2021 |
| PD-1 | NCT04768075 | O; NR | NSCLC   | Camrelizumab; Cisplatin;<br>Carboplatin; Pemetrexed;<br>Paclitaxel                      | III   | 200 | 2021 |
| PD-1 | NCT04777084 | O     | NSCLC   | IBI318                                                                                  | II    | 30  | 2021 |
| PD-1 | NCT04782089 | O; NR | SCLC    | Camrelizumab; anti-PD-1;<br>Fluzoparib                                                  | NA    | 20  | 2021 |
| PD-1 | NCT04790539 | O; NR | ES-SCLC | Camrelizumab                                                                            | II    | 71  | 2021 |
| PD-1 | NCT04791839 | O; NR | NSCLC   | Zimberelimab; Domvanalimab;<br>Etrumadenant                                             | II    | 30  | 2021 |
| PD-1 | NCT04836728 | O; NR | M NSCLC | CIK; Sintilimab; Pemetrexed;<br>Paclitaxel; Carboplatin                                 | II    | 156 | 2021 |
| PD-1 | NCT04875585 | O; NR | NSCLC   | Pembrolizumab; Lenvatinib                                                               | II    | 33  | 2021 |
| PD-1 | NCT04900363 | O     | NSCLC   | AK112                                                                                   | I; II | 360 | 2021 |
| PD-1 | NCT04901754 | O; NR | SCLC    | Camrelizumab; Apatinib                                                                  | II    | 38  | 2021 |
| PD-1 | NCT04921358 | O; NR | NSCLC   | Tislelizumab; Sitravatinib;<br>Docetaxel                                                | III   | 420 | 2021 |
| PD-1 | NCT04924101 | O; NR | SCLC    | Pembrolizumab; MK-4830;<br>MK-5890; Lenvatinib;<br>Etoposide; Cisplatin;<br>Carboplatin | II    | 120 | 2021 |

|             |             |       |                              |                                                                                   |         |      |      |
|-------------|-------------|-------|------------------------------|-----------------------------------------------------------------------------------|---------|------|------|
| PD-1        | NCT04938817 | O; NR | NSCLC                        | Pembrolizumab; Quavonlimab;<br>Lenvatinib; MK-4830;<br>Favezelimab; Pembrolizumab | I; II   | 80   | 2021 |
| PD-1        | NCT04943029 | O; NR | NSCLC                        | Carrelizumab; Pemetrexed;<br>Paclitaxel; Carboplatin                              | II      | 30   | 2021 |
| PD-1        | NCT04736173 | O     | NSCLC; Non-SqCC;<br>SqCC; LC | Zimberelimab; AB154;<br>Carboplatin; Pemetrexed;<br>Paclitaxel                    | III     | 625  | 2021 |
| PD-1; PD-L1 | NCT04672928 | O     | SCLC                         | Paclitaxel; IBI318                                                                | I       | 20   | 2020 |
| PD-1; PD-L1 | NCT04702009 | O; NR | A LC; A NSCLC                | Anti-PD-1; PD-L1;<br>Chemotherapy                                                 | II; III | 80   | 2021 |
| PD-L1       | NCT02273375 | O; NR | NSCLC                        | Durvalumab                                                                        | III     | 1360 | 2014 |
| PD-L1       | NCT02367794 | C     | SqCC                         | Atezolizumab; Carboplatin;<br>Paclitaxel                                          | III     | 1021 | 2015 |
| PD-L1       | NCT02400814 | O; NR | R NSCLC; A NSCLC             | Atezolizumab; Radiation                                                           | I       | 27   | 2015 |
| PD-L1       | NCT02463994 | C     | NSCLC                        | Atezolizumab; Radiation                                                           | Early-I | 12   | 2015 |
| PD-L1       | NCT02486718 | O; NR | NSCLC                        | Atezolizumab; Cisplatin;<br>Vinorelbine; Docetaxel;<br>Gemcitabine; Pemetrexed    | III     | 1280 | 2015 |
| PD-L1       | NCT02576574 | O; NR | NSCLC                        | Avelumab; Pemetrexed;<br>Paclitaxel; Gemcitabine;<br>Carboplatin; Cisplatin       | III     | 1224 | 2015 |

|       |             |       |               |                                                                                                                  |     |     |      |
|-------|-------------|-------|---------------|------------------------------------------------------------------------------------------------------------------|-----|-----|------|
| PD-L1 | NCT02572843 | O; NR | NSCLC         | Durvalumab                                                                                                       | II  | 68  | 2016 |
| PD-L1 | NCT02657434 | O; NR | NSCLC         | Atezolizumab; Carboplatin;<br>Cisplatin; Pemetrexed                                                              | III | 578 | 2016 |
| PD-L1 | NCT02813785 | O; NR | Cancer; NSCLC | Atezolizumab; Docetaxel                                                                                          | III | 565 | 2016 |
| PD-L1 | NCT02994576 | O     | NSCLC         | Atezolizumab                                                                                                     | II  | 60  | 2016 |
| PD-L1 | NCT02879617 | O     | NSCLC         | Durvalumab                                                                                                       | II  | 50  | 2017 |
| PD-L1 | NCT02927301 | O; NR | NSCLC         | Atezolizumab                                                                                                     | II  | 181 | 2017 |
| PD-L1 | NCT03003962 | O; NR | NSCLC         | Durvalumab; Paclitaxel;<br>Carboplatin; Gemcitabine;<br>Cisplatin                                                | III | 669 | 2017 |
| PD-L1 | NCT03014648 | O     | A NSCLC       | Atezolizumab                                                                                                     | II  | 111 | 2017 |
| PD-L1 | NCT03191786 | O; NR | NSCLC         | Atezolizumab; Vinorelbine;<br>Gemcitabine                                                                        | III | 453 | 2017 |
| PD-L1 | NCT03334617 | O     | NSCLC         | Durvalumab; AZD9150;<br>AZD6738; Vistusertib;<br>Olaparib; Oleclumab;<br>Trastuzumab; Cediranib;<br>Ceralasertib | II  | 410 | 2017 |
| PD-L1 | NCT03446547 | O     | E NSCLC       | Durvalumab                                                                                                       | II  | 106 | 2017 |
| PD-L1 | NCT03262454 | O     | R SCLC        | Atezolizumab                                                                                                     | II  | 35  | 2018 |

|       |             |       |                              |                                                                                 |       |     |      |
|-------|-------------|-------|------------------------------|---------------------------------------------------------------------------------|-------|-----|------|
| PD-L1 | NCT03456063 | O     | NSCLC                        | Atezolizumab; Paclitaxel;<br>Pemetrexed; Carboplatin;<br>Cisplatin; Gemcitabine | III   | 450 | 2018 |
| PD-L1 | NCT03554473 | O     | Cancer; LC; SCLC             | M7824; Topotecan;<br>Temozolomide                                               | I; II | 67  | 2018 |
| PD-L1 | NCT03563716 | O; NR | NSCLC                        | Atezolizumab; Tiragolumab;                                                      | II    | 135 | 2018 |
| PD-L1 | NCT03600701 | O     | M NSCLC; R NSCLC;<br>A NSCLC | Atezolizumab; Cobimetinib                                                       | II    | 48  | 2018 |
| PD-L1 | NCT03620669 | O     | A NSCLC                      | Durvalumab                                                                      | II    | 48  | 2018 |
| PD-L1 | NCT03631706 | O; NR | NSCL                         | M7824; Pembrolizumab                                                            | III   | 584 | 2018 |
| PD-L1 | NCT03706690 | O     | Cancer; NSCLC                | Durvalumab;                                                                     | III   | 360 | 2018 |
| PD-L1 | NCT03789604 | O; NR | NSCLC                        | CS1001                                                                          | III   | 479 | 2018 |
| PD-L1 | NCT03800134 | O     | NSCLC                        | Durvalumab; Carboplatin;<br>Paclitaxel; Cisplatin;<br>Gemcitabine; Pemetrexed   | III   | 800 | 2018 |
| PD-L1 | NCT03694236 | O     | E NSCLC                      | Durvalumab                                                                      | I; II | 39  | 2019 |
| PD-L1 | NCT03786692 | O     | NSCLC                        | Carboplatin; Pemetrexed;<br>Bevacizumab; Atezolizumab                           | II    | 117 | 2019 |
| PD-L1 | NCT03833154 | O     | Cancer; NSCLC                | Durvalumab; Radiation                                                           | III   | 706 | 2019 |
| PD-L1 | NCT03833440 | O     | NSCLC                        | Durvalumab; Monalizumab;<br>Oleclumab; Ceralasertib;<br>Docetaxel               | II    | 120 | 2019 |

|       |             |       |                  |                                                                                                  |     |     |      |
|-------|-------------|-------|------------------|--------------------------------------------------------------------------------------------------|-----|-----|------|
| PD-L1 | NCT03840902 | O     | NSCL             | M7824; Durvalumab;<br>Etoposide; Pemetrexed;<br>Carboplatin; Paclitaxel;<br>Cisplatin; Radiation | II  | 350 | 2019 |
| PD-L1 | NCT03896074 | O; NR | NSCLC            | Atezolizumab; Bevacizumab                                                                        | II  | 206 | 2019 |
| PD-L1 | NCT03991403 | O     | NSCLC            | Atezolizumab; Pemetrexed;<br>Bevacizumab; Carboplatin;<br>Paclitaxe; Cisplatin                   | III | 228 | 2019 |
| PD-L1 | NCT04081688 | O     | R NSCLC; A NSCLC | Atezolizumab; Radiation;<br>Varlilumab                                                           | I   | 15  | 2019 |
| PD-L1 | NCT04108026 | O     | A NSCLC          | Durvalumab                                                                                       | II  | 67  | 2020 |
| PD-L1 | NCT04194203 | O     | Cancer; NSCLC    | Atezolizumab; Bevacizumab;<br>Paclitaxel; Pemetrexed;<br>Carboplatin                             | III | 306 | 2020 |
| PD-L1 | NCT04202809 | O     | NSCLC            | Durvalumab                                                                                       | II  | 90  | 2020 |
| PD-L1 | NCT04224337 | O     | Cancer; NSCLC    | Durvalumab; Doxorubicin;<br>Ifosfamide                                                           | II  | 34  | 2020 |
| PD-L1 | NCT04234607 | O; NR | A SCLC           | TQB2450; Anlotinib;<br>Etoposide; Carboplatin                                                    | III | 738 | 2020 |
| PD-L1 | NCT04245514 | O     | NSCLC            | Durvalumab; Radiation                                                                            | II  | 90  | 2020 |
| PD-L1 | NCT04255836 | O; NR | Cancer; NSCLC    | Durvalumab; Chemotherapy;<br>Radiation                                                           | II  | 35  | 2020 |

|       |             |       |                         |                                        |     |     |      |
|-------|-------------|-------|-------------------------|----------------------------------------|-----|-----|------|
| PD-L1 | NCT04294810 | O     | NSCLC                   | Atezolizumab; Tiragolumab              | III | 560 | 2020 |
| PD-L1 | NCT04306926 | O; NR | A NSCLC; M NSCLC        | TQB2450; Radiation                     | II  | 59  | 2020 |
| PD-L1 | NCT04316364 | O     | NSCLC                   | SHR-1316; Paclitaxel;<br>Carboplatin   | III | 456 | 2020 |
| PD-L1 | NCT04346914 | O     | ES-SCLC                 | Anti-PD-L1; Carboplatin;<br>Etoposide  | I   | 20  | 2020 |
| PD-L1 | NCT04385368 | O     | Cancer; NSCLC           | Durvalumab; Chemotherapy               | III | 332 | 2020 |
| PD-L1 | NCT04392505 | O     | Cancer; NSCLC           | Durvalumab                             | II  | 100 | 2020 |
| PD-L1 | NCT04396535 | O     | A NSCLC                 | Bintrafusp alfa; Docetaxel             | II  | 80  | 2020 |
| PD-L1 | NCT04470674 | O     | LC; NSCLC (KRAS<br>Mut) | Durvalumab; Carboplatin;<br>Pemetrexed | II  | 50  | 2020 |
| PD-L1 | NCT04539977 | O     | SCLC                    | TQB2450                                | II  | 40  | 2020 |
| PD-L1 | NCT04549428 | O     | A NSCLC                 | Atezolizumab                           | II  | 20  | 2020 |
| PD-L1 | NCT04560244 | O; NR | NSCLC                   | SHR1701                                | II  | 15  | 2020 |
| PD-L1 | NCT04560686 | O     | E NSCLC                 | Bintrafusp alfa                        | II  | 23  | 2020 |
| PD-L1 | NCT04562337 | O; NR | ES-SCLC                 | SHR-1316; Chemotherapy;<br>Radiation   | II  | 67  | 2020 |
| PD-L1 | NCT04642469 | O     | Cancer; NSCLC           | Durvalumab                             | III | 284 | 2020 |
| PD-L1 | NCT04647357 | O; NR | LS-SCLC                 | SHR-1316                               | II  | 60  | 2020 |
| PD-L1 | NCT04740021 | O     | SCLC                    | LP002; Carboplatin; Etoposide          | II  | 46  | 2020 |
| PD-L1 | NCT04348292 | O     | NSCLC                   | Durvalumab; Sirolimus                  | I   | 31  | 2021 |
| PD-L1 | NCT04716946 | O     | NSCLC; LC               | Durvalumab; Radiation                  | II  | 40  | 2021 |



|       |             |       |                                 |                                                                                                 |       |     |      |
|-------|-------------|-------|---------------------------------|-------------------------------------------------------------------------------------------------|-------|-----|------|
| PD-L1 | NCT04776447 | O; NR | LC; Thoracic cancer             | Carboplatin; Paclitaxel;<br>Atezolizumab                                                        | II    | 51  | 2021 |
| PD-L1 | NCT04786093 | O; NR | NSCLC                           | Radiation; Durvalumab                                                                           | II    | 52  | 2021 |
| PD-L1 | NCT04786964 | O; NR | M Non-SqCC                      | Cosibelimab; Cisplatin;<br>Carboplatin                                                          | III   | 560 | 2021 |
| PD-L1 | NCT04832854 | O     | NSCLC                           | Atezolizumab; Tiragolumab;<br>Carboplatin; Cisplatin;<br>Pemetrexed; Gemcitabine;<br>Paclitaxel | II    | 82  | 2021 |
| PD-L1 | NCT04841538 | O; NR | Thoracic cancer;<br>NSCLC; SCLC | ES101                                                                                           | I; II | 276 | 2021 |
| PD-L1 | NCT04866017 | O     | NSCLC                           | Tislelizumab; Durvalumab;<br>Chemotherapy; Ociperlimab                                          | III   | 900 | 2021 |
| PD-L1 | NCT04870112 | O; NR | NSCLC; SCLC                     | Durvalumab; Cisplatin;<br>Carboplatin; Etoposide                                                | I; II | 124 | 2021 |
| PD-L1 | NCT04878016 | O; NR | ES-SCLC                         | ZKAB001; Carboplatin;<br>Etoposide                                                              | III   | 498 | 2021 |
| PD-L1 | NCT04889066 | O; NR | M NSCLC (BM)                    | Radiation; Durvalumab                                                                           | II    | 40  | 2021 |
| PD-L1 | NCT04892953 | O; NR | NSCLC                           | Carboplatin; Durvalumab;<br>Gemcitabine; Paclitaxel;<br>Pemetrexed                              | II    | 51  | 2021 |

*Abbreviations:* **C**, Closed; **O**, Open; **NR**, Not Recruiting; **NA**, Not Associated; **A**, Advanced; **M**, Metastatic; **R**, Recurrent; **T**, Terminated; **ES-SCLC**, Extensive-Stage Small Cell Lung Cancer; **LS-SCLC**, Limited-Stage Small Cell Lung Cancer; **LC**, Lung Cancer; **ADC**, Adenocarcinoma; **NSCLC**, Non Small Cell Lung Cancer; **SqCC**, Squamous Carcinoma.
