# Supplementary material for: Clinical Relevance of Targeted Therapy and Immune-Checkpoint Inhibition in Lung Cancer
Source: MDPI journal article supplement (doi:10.3390/pharmaceutics15041252), 2023-04-16
Supplement: s1 [file s1]

**Supplementary Table S3.** Ongoing clinical studies on targeted therapies and immune-checkpoint inhibitors in combination registered at clinicaltrials.gov

| Targets     | Study ID    | Status | Conditions                   | Interventions                         | Phase | Enrollment | Start Date |
|-------------|-------------|--------|------------------------------|---------------------------------------|-------|------------|------------|
| ALK; PD-1   | NCT04139317 | O; NR  | NSCLC                        | Capmatinib; Pembrolizumab             | II    | 76         | 2020       |
| ALK; PD-L1  | NCT02898116 | C      | NSCLC; Cancer                | Ensartinib; Durvalumab                | I; II | 2          | 2017       |
| EGFR; CTLA4 | NCT04141644 | O      | NSCLC (EGFR Mut)             | Ipilimumab; Osimertinib               | I     | 26         | 2020       |
| EGFR; PD-1  | NCT02323126 | C      | NSCLC                        | Nazartinib; Capmatinib;<br>Nivolumab  | II    | 64         | 2015       |
| EGFR; PD-1  | NCT02364609 | O; NR  | R NSCLC; A<br>NSCLC          | Afatinib; Pembrolizumab               | I     | 38         | 2015       |
| EGFR; PD-1  | NCT04976647 | O; NR  | SqCC; NSCLC                  | HLX10; HLX07;<br>Chemotherapy         | II    | 156        | 2021       |
| EGFR; PD-L1 | NCT02013219 | C      | NSCLC                        | Alectinib; Atezolizumab;<br>Erlotinib | I     | 52         | 2014       |
| KRAS; PD-1  | NCT04263090 | O      | NSCLC; ADC                   | Rigosertib; Nivolumab                 | I; II | 30         | 2020       |
| KRAS; PD-1  | NCT04613596 | O      | A NSCLC; M Cancer            | Adagrasib; Pembrolizumab              | II    | 120        | 2020       |
| MEK; PD-1   | NCT03225664 | O; NR  | M NSCLC; R<br>NSCLC; A NSCLC | Pembrolizumab; Trametinib             | I; II | 37         | 2018       |

|                        |             |       |                                                  |                                         |       |     |      |
|------------------------|-------------|-------|--------------------------------------------------|-----------------------------------------|-------|-----|------|
| MEK; PD-1              | NCT03299088 | O; NR | M Non-SqCC; R<br>Non-SqCC; A<br>NSCLC (KRAS Mut) | Pembrolizumab; Trametinib               | I     | 15  | 2018 |
| MEK; PD-1              | NCT04323436 | O     | Cancer; NSCLC                                    | Spartalizumab; Capmatinib               | II    | 270 | 2020 |
| MET; PD-1              | NCT03647488 | C     | Cancer; NSCLC                                    | Capmatinib; Spartalizumab;<br>Docetaxel | II    | 18  | 2018 |
| MET; PD-1              | NCT03906071 | O     | M Non-SqCC                                       | Nivolumab; Sitravatinib;<br>Docetaxel   | III   | 532 | 2019 |
| MET; PD-L1             | NCT04139317 | O; NR | NSCLC                                            | Capmatinib; Pembrolizumab               | II    | 76  | 2020 |
| PI3K; PD-1             | NCT03257722 | O     | NSCLC; M NSCLC;<br>R NSCLC                       | Pembrolizumab; Idelalisib               | I; II | 40  | 2017 |
| ROS-1; CTLA-4;<br>PD-1 | NCT03468985 | O; NR | M Non-SqCC; R<br>Non-SqCC; A Non-<br>SqCC        | Cabozantinib; Ipilimumab;<br>Nivolumab  | II    | 169 | 2018 |

*Abbreviations:* **C**, Closed; **O**, Open; **NR**, Not Recruiting; **NA**, Not Associated; **A**, Advanced; **M**, Metastatic; **R**, Recurrent; **ADC**, Adenocarcinoma; **NSCLC**, Non-Small Cell Lung Cancer; **SqCC**, Squamous Carcinoma.
