# Supplementary material for: Clinical Relevance of Targeted Therapy and Immune-Checkpoint Inhibition in Lung Cancer
Source: MDPI journal article supplement (doi:10.3390/pharmaceutics15041252), 2023-04-16
Supplement: s1 [file s1]

**Supplementary Table S1.** Ongoing clinical studies on targeted therapies registered at clinicaltrials.gov

| Target | Study ID    | Status | Conditions                    | Interventions                                                                | Phase   | Enrollment | Start Date |
|--------|-------------|--------|-------------------------------|------------------------------------------------------------------------------|---------|------------|------------|
| ALK    | NCT01562015 | C      | NSCLC                         | Ganetespib                                                                   | II      | 12         | 2012       |
| ALK    | NCT01712217 | C      | NSCLC                         | Onalespib; Crizotinib                                                        | I; II   | 220        | 2012       |
| ALK    | NCT01752400 | C      | NSCLC                         | Luminespib                                                                   | II      | 6          | 2013       |
| ALK    | NCT01772797 | C      | NSCLC (ALK Mut)               | Ceritinib; Luminespib                                                        | I       | 22         | 2013       |
| ALK    | NCT02040870 | C      | NSCLC                         | Ceritinib                                                                    | I; II   | 103        | 2014       |
| ALK    | NCT02292550 | C      | NSCLC                         | Ribociclib; Ceritinib                                                        | I       | 27         | 2015       |
| ALK    | NCT02299505 | C      | NSCLC                         | Ceritinib                                                                    | I       | 306        | 2015       |
| ALK    | NCT02336451 | C      | NSCLC (ALK Mut)               | Ceritinib                                                                    | II      | 156        | 2015       |
| ALK    | NCT02521051 | O      | NSCLC                         | Alectinib; Bevacizumab                                                       | I; II   | 43         | 2015       |
| ALK    | NCT02767804 | O      | NSCLC                         | Ensartinib; Crizotinib                                                       | III     | 290        | 2016       |
| ALK    | NCT03130881 | O      | NSCLC                         | PLB1003                                                                      | I       | 60         | 2016       |
| ALK    | NCT03155009 | C      | Solid cancer; NSCLC           | Alectinib                                                                    | II      | 44         | 2017       |
| ALK    | NCT03202940 | O      | NSCLC                         | Alectinib; Cobimetinib                                                       | I; II   | 31         | 2017       |
| ALK    | NCT03410108 | O      | A NSCLC (ALK Mut)             | Brigatinib                                                                   | II      | 104        | 2018       |
| ALK    | NCT03456076 | O      | Solid cancer; NSCLC           | Alectnib; Cisplatin;<br>Vinorelbine; Gemcitabine;<br>Pemetrexed; Carboplatin | III     | 255        | 2018       |
| ALK    | NCT03707938 | O      | A NSCLC; R NSCLC<br>(ALK Mut) | Brigatinib                                                                   | Early-I | 35         | 2018       |
| ALK    | NCT03909971 | O      | Solid cancer; NSCLC           | Lorlatinib                                                                   | II      | 100        | 2019       |

|                            |             |   |                           |                                                   |     |     |      |
|----------------------------|-------------|---|---------------------------|---------------------------------------------------|-----|-----|------|
| ALK                        | NCT04009317 | O | NSCLC (ALK Mut)           | TQ-B3139; Crizotinib                              | III | 260 | 2019 |
| ALK                        | NCT04056572 | O | NSCLC (ALK Mut)           | TQ-B3139                                          | II  | 135 | 2019 |
| ALK                        | NCT04415320 | O | NSCLC; M SSCLC (BM)       | Ensartinib                                        | II  | 37  | 2019 |
| ALK                        | NCT04632758 | O | NSCLC                     | WX-0593; Crizotinib                               | III | 330 | 2019 |
| ALK                        | NCT04111705 | O | M NSCLC                   | Lorlatinib                                        | II  | 112 | 2020 |
| ALK                        | NCT04211922 | O | NSCLC (ALK Mut)           | Alkotinib                                         | II  | 104 | 2020 |
| ALK                        | NCT04227028 | O | A NSCLC; M NSCLC; R NSCLC | Bevacizumab; Brigatinib                           | I   | 31  | 2020 |
| ALK                        | NCT04362072 | O | Cancer; NSCLC             | Lorlatinib                                        | IV  | 85  | 2020 |
| ALK                        | NCT04634110 | O | LC; M LC (BM)             | Brigatinib                                        | II  | 19  | 2020 |
| ALK                        | NCT04837716 | O | M NSCLC; R NSCLC; A NSCLC | Bevacizumab; Carboplatin; Ensartinib; Pemetrexed  | I   | 12  | 2021 |
| ALK; BRAF                  | NCT02314481 | O | NSCLC                     | Atezolizumab; Vemurafenib; Alectinib; Trastuzumab | II  | 119 | 2017 |
| ALK; BRAF; EGFR; RET; ROS1 | NCT01922583 | C | NSCLC                     | Luminespib                                        | II  | 31  | 2014 |
| ALK; BRAF; EGFR; ROS1      | NCT03790228 | O | Non-SqCC                  | Anlotinib; Pemetrexed; Carboplatin                | I   | 43  | 2019 |

|                                        |             |       |                                   |                                                                                   |       |     |      |
|----------------------------------------|-------------|-------|-----------------------------------|-----------------------------------------------------------------------------------|-------|-----|------|
| ALK; BRAF;<br>KRAS; MET;<br>PI3K; ROS1 | NCT02276027 | C     | ADC; SqCC                         | Alpelisib; Capmatinib;<br>Ceritinib; Binimetinib                                  | II    | 66  | 2015 |
| ALK; BRAF;<br>NTRK; ROS1;<br>RET       | NCT04302025 | O     | NSCLC                             | Alectinib; Entrectinib;<br>Vemurafenib; Cobimetinib;<br>Chemotherapy; Pralsetinib | II    | 60  | 2020 |
| ALK; EGFR                              | NCT02013219 | C     | NSCLC                             | Alectinib; Atezolizumab;<br>Erlotinib                                             | I     | 52  | 2014 |
| ALK; MET                               | NCT04139317 | O; NR | NSCLC                             | Capmatinib; Pembrolizumab                                                         | II    | 76  | 2020 |
| ALK; RET                               | NCT03194893 | O; NR | Cancer; LC                        | Alectinib; Crizotinib                                                             | III   | 200 | 2017 |
| ALK; ROS1                              | NCT02927340 | O     | NSCLC                             | Lorlatinib                                                                        | II    | 30  | 2016 |
| ALK; ROS1                              | NCT03087448 | O     | NSCLC                             | Ceritinib; Trametinib                                                             | I; II | 69  | 2017 |
| ALK; ROS1                              | NCT03088930 | C     | LC; NSCLC                         | Crizotinib                                                                        | II    | 3   | 2017 |
| ALK; ROS1                              | NCT03607188 | O     | NSCLC                             | Alkotinib                                                                         | I     | 18  | 2018 |
| ALK; ROS1                              | NCT03672643 | O     | NSCLC (ALK Mut;<br>ROS1 Mut)      | Crizotinib                                                                        | IV    | 75  | 2019 |
| ALK; ROS1                              | NCT04641754 | O     | NSCLC                             | WX-0593                                                                           | II    | 176 | 2019 |
| ALK; ROS1                              | NCT04005144 | O     | A NSCLC (ALK Mut;<br>ROS1 Mut)    | Binimetinib; Brigatinib                                                           | I     | 18  | 2020 |
| ALK; ROS1                              | NCT04292119 | O     | LC (ALK Mut;ROS1<br>Mut; MET Mut) | Lorlatinib; Crizotinib;<br>Binimetinib; TNO155                                    | I; II | 96  | 2020 |
| ALK; ROS1                              | NCT04541706 | O; NR | A NSCLC                           | Lorlatinib                                                                        | IV    | 111 | 2020 |

|                 |             |   |                           |                                                                                                                              |         |     |      |
|-----------------|-------------|---|---------------------------|------------------------------------------------------------------------------------------------------------------------------|---------|-----|------|
| BRAF            | NCT03543306 | O | Cancer; M LC (BRAF V600E) | Dabrafenib; Trametinib                                                                                                       | II      | 27  | 2018 |
| BRAF            | NCT04452877 | O | Solid cancer; NSCLC       | Dabrafenib; Trametinib                                                                                                       | II      | 20  | 2020 |
| BRAF            | NCT04526782 | O | NSCLC (BRAF V600E)        | Encorafenib; Binimetinib; Docetaxel                                                                                          | II      | 144 | 2021 |
| BRAF; RET; ROS1 | NCT03178552 | O | NSCLC                     | Alectinib; Atezolizumab; Pemetrexed; Cisplatin; Carboplatin; Gemcitabine; Entrectinib; Cobimetinib; Vemurafenib; Bevacizumab | II; III | 700 | 2017 |
| BRAF; ROS1      | NCT04581824 | O | LC; NSCLC                 | Dostarlimab; Pembrolizumab; Chemotherapy                                                                                     | II      | 240 | 2020 |
| EGFR            | NCT00034346 | C | NSCLC; M NSCLC            | Panitumumab; Paclitaxel; Carboplatin                                                                                         | II      | 194 | 2002 |
| EGFR            | NCT00101920 | C | NSCLC; M NSCLC            | Panitumumab                                                                                                                  | II      | 50  | 2003 |
| EGFR            | NCT00585533 | C | LC                        | Erlotinib                                                                                                                    | II      | 40  | 2004 |
| EGFR            | NCT00266877 | C | Solid cancer; NSCLC       | Neratinib                                                                                                                    | II      | 172 | 2005 |
| EGFR            | NCT00411047 | C | LC                        | Gefitinib                                                                                                                    | II      | 34  | 2005 |
| EGFR            | NCT02774278 | C | Non-SqCC                  | Erlotinib                                                                                                                    | II      | 264 | 2005 |
| EGFR            | NCT00364780 | C | NSCLC                     | Tesevatinib                                                                                                                  | II      | 55  | 2006 |
| EGFR            | NCT00370383 | C | LC                        | Erlotinib; Satraplatin                                                                                                       | II      | 100 | 2006 |
| EGFR            | NCT00385996 | C | Solid cancer; NSCLC       | Erlotinib                                                                                                                    | II      | 22  | 2006 |

|      |             |   |                            |                                            |       |     |      |
|------|-------------|---|----------------------------|--------------------------------------------|-------|-----|------|
| EGFR | NCT00615758 | C | NSCLC                      | Erlotinib                                  | II    | 50  | 2006 |
| EGFR | NCT00459342 | C | NSCLC; R NSCLC;<br>A NSCLC | Dasatinib                                  | II    | 35  | 2007 |
| EGFR | NCT00522145 | C | Solid cancer; NSCLC        | Tesevatinib                                | II    | 41  | 2007 |
| EGFR | NCT00567359 | C | NSCLC                      | Erlotinib                                  | II    | 100 | 2007 |
| EGFR | NCT00577707 | C | NSCLC; LC                  | Erlotinib; Pemetrexed;<br>Cisplatin        | II    | 9   | 2007 |
| EGFR | NCT00596648 | C | Solid cancer; NSCLC        | Cabozantinib; Erlotinib                    | I; II | 92  | 2007 |
| EGFR | NCT00608868 | C | NSCLC                      | Gefitinib                                  | IV    | 156 | 2007 |
| EGFR | NCT00750698 | C | NSCLC                      | Entinostat; Erlotinib                      | II    | 70  | 2008 |
| EGFR | NCT00796549 | C | Solid cancer; NSCLC        | Afatinib                                   | II    | 70  | 2008 |
| EGFR | NCT01167244 | C | NSCLC                      | BMS-690514                                 | II    | 11  | 2010 |
| EGFR | NCT01211483 | C | A NSCLC                    | Patritumab; Erlotinib                      | I; II | 222 | 2010 |
| EGFR | NCT01221077 | C | NSCLC                      | Linsitinib; Erlotinib                      | II    | 88  | 2011 |
| EGFR | NCT01260181 | C | Non-SqCC                   | Erlotinib                                  | II    | 30  | 2011 |
| EGFR | NCT01287754 | C | NSCLC                      | Erlotinib                                  | IV    | 24  | 2011 |
| EGFR | NCT01404260 | C | NSCLC                      | Gefitinib; Gemcitabine;<br>Carboplatin     | III   | 219 | 2011 |
| EGFR | NCT01465802 | C | NSCLC                      | Dacomitinib; Doxycycline;<br>Alclometasone | II    | 236 | 2011 |
| EGFR | NCT01513174 | C | NSCLC                      | Gefitinib; Alaparib                        | I; II | 186 | 2011 |

|      |             |   |                                 |                                            |       |     |      |
|------|-------------|---|---------------------------------|--------------------------------------------|-------|-----|------|
| EGFR | NCT01516983 | C | NSCLC; M NSCLC (BM)             | Icotinib; Radiation                        | I; II | 15  | 2011 |
| EGFR | NCT01372384 | C | Non-SqCC                        | Erlotinib                                  | II    | 6   | 2012 |
| EGFR | NCT01415011 | C | Solid cancer; NSCLC             | Afatinib                                   | II    | 39  | 2012 |
| EGFR | NCT01470716 | O | NSCLC; A NSCLC                  | Erlotinib                                  | II    | 26  | 2012 |
| EGFR | NCT01530334 | C | LC                              | Gefitinib                                  | II    | 61  | 2012 |
| EGFR | NCT01553942 | O | LC                              | Afatinib; Radiation; Cisplatin; Pemetrexed | II    | 30  | 2012 |
| EGFR | NCT01667562 | C | NSCLC                           | Erlotinib                                  | III   | 375 | 2012 |
| EGFR | NCT01746251 | O | NSCLC                           | Afatinib                                   | II    | 92  | 2013 |
| EGFR | NCT01953913 | C | Solid cancer; NSCLC             | Afatinib                                   | III   | 542 | 2013 |
| EGFR | NCT01967095 | C | EGFR-Mutant; LC                 | Erlotinib                                  | I     | 53  | 2013 |
| EGFR | NCT02000531 | C | Solid cancer; NSCLC             | Erlotinib; Chemotherapy                    | IV    | 45  | 2014 |
| EGFR | NCT02025114 | C | NSCLC                           | Selumetinib                                | I; II | 34  | 2014 |
| EGFR | NCT02113813 | C | NSCLC (EGFR Mut)                | Naquotinib;Midazolam                       | I     | 133 | 2014 |
| EGFR | NCT02155465 | C | LC                              | Ruxolitinib; Erlotinib                     | I; II | 22  | 2014 |
| EGFR | NCT02191891 | C | Solid cancer; NSCLC             | Xentuzumab; Afatinib                       | I     | 32  | 2014 |
| EGFR | NCT02264210 | O | LC; SqCC; ADC; ADSC; LCC; NSCLC | Icotinib                                   | II    | 128 | 2015 |
| EGFR | NCT02442349 | O | NSCLC                           | Osimertinib                                | II    | 171 | 2015 |
| EGFR | NCT02444819 | C | NSCLC                           | Olmutinib                                  | II    | 33  | 2015 |
| EGFR | NCT02448797 | O | NSCLC                           | Icotinib; Chemotherapy                     | III   | 320 | 2015 |

|      |             |   |                                                |                                          |       |     |      |
|------|-------------|---|------------------------------------------------|------------------------------------------|-------|-----|------|
| EGFR | NCT02514174 | C | Solid cancer; NSCLC                            | Afatinib                                 | IV    | 25  | 2015 |
| EGFR | NCT02714010 | O | NSCLC                                          | EGFR-TKI; Radiation                      | III   | 601 | 2015 |
| EGFR | NCT02804776 | C | NSCLC                                          | Gefitinib                                | II    | 15  | 2015 |
| EGFR | NCT02183883 | O | NSCLC                                          | Afatinib                                 | II    | 48  | 2016 |
| EGFR | NCT02496663 | O | M NSCLC; R<br>NSCLC; A NSCLC                   | Necitumumab; Osimertinib                 | I     | 100 | 2016 |
| EGFR | NCT02520778 | O | A Non-SqCC; M<br>Non-SqCC; A<br>NSCLC; M NSCLC | Navitoclax; Osimertinib                  | I     | 50  | 2016 |
| EGFR | NCT02716311 | O | NSCLC                                          | Afatinib; Cetuximab                      | II    | 118 | 2016 |
| EGFR | NCT02726568 | O | NSCLC; M NSCLC<br>(BM)                         | Icotinib; Radiation                      | II    | 30  | 2016 |
| EGFR | NCT02736513 | O | LC                                             | Osimertinib                              | II    | 40  | 2016 |
| EGFR | NCT02789345 | O | NSCLC                                          | Ramucirumab; Necitumumab;<br>Osimertinib | I     | 74  | 2016 |
| EGFR | NCT02820116 | O | NSCLC                                          | Icotinib                                 | II    | 67  | 2016 |
| EGFR | NCT02841579 | C | NSCLC                                          | Osimertinib                              | II    | 22  | 2016 |
| EGFR | NCT02914990 | C | NSCLC                                          | BPI-15086                                | I     | 36  | 2016 |
| EGFR | NCT02954523 | O | NSCLC (EGFR Mut)                               | Dasatinib; Osimertinib                   | I; II | 10  | 2016 |
| EGFR | NCT02976116 | C | NSCLC                                          | Fruquintinib; Gefitinib                  | II    | 50  | 2016 |
| EGFR | NCT03053219 | C | Solid cancer; NSCLC                            | AC0010                                   | I     | 7   | 2016 |
| EGFR | NCT02856893 | O | NSCLC                                          | Osimertinib; Gefitinib                   | II    | 156 | 2017 |

|      |             |       |                                                      |                                                                              |       |     |      |
|------|-------------|-------|------------------------------------------------------|------------------------------------------------------------------------------|-------|-----|------|
| EGFR | NCT03054038 | O     | NSCLC                                                | Afatinib; Necitumumab                                                        | I     | 60  | 2017 |
| EGFR | NCT03066206 | O     | R NSCLC; A NSCLC<br>(EGFR Exon 20 Mut;<br>ERBB2 Mut) | Poziotinib                                                                   | II    | 80  | 2017 |
| EGFR | NCT03122717 | O     | NSCLC                                                | Gefitinib; Osimertinib                                                       | I; II | 48  | 2017 |
| EGFR | NCT03292133 | O     | LC                                                   | Nazartinib; Gefitinib                                                        | II    | 11  | 2017 |
| EGFR | NCT03318939 | O     | NSCLC                                                | Poziotinib                                                                   | II    | 603 | 2017 |
| EGFR | NCT03386955 | O     | NSCLC                                                | BPI-7711                                                                     | I; II | 215 | 2017 |
| EGFR | NCT03502850 | O     | A NSCLC; M NSCLC                                     | ASK120067                                                                    | I; II | 507 | 2017 |
| EGFR | NCT03239340 | O     | A NSCLC; M NSCLC<br>(EGFR Mut)                       | Osimertinib                                                                  | II    | 154 | 2018 |
| EGFR | NCT03333343 | O     | NSCLC (EGFR Mut)                                     | Nazartinib; Trametinib;<br>Ribociclib; Naporafenib;<br>Capmatinib; Gefitinib | I     | 105 | 2018 |
| EGFR | NCT03349203 | O     | NSCLC (EGFR Mut)                                     | Icotinib                                                                     | II    | 60  | 2018 |
| EGFR | NCT03381066 | O     | Resected NSCLC<br>(EGFR Mut)                         | Gefitinib; Pemetrexed;<br>Cisplatin; Vinorelbine                             | III   | 225 | 2018 |
| EGFR | NCT03381274 | O     | Solid cancer; NSCLC                                  | Oleclumab; Osimertinib;<br>AZD4635                                           | I; II | 43  | 2018 |
| EGFR | NCT03381430 | O; NR | LC                                                   | Gefitinib                                                                    | NA    | 50  | 2018 |
| EGFR | NCT03389256 | O; NR | Thoracic cancer;<br>NSCLC                            | Apatinib; EGFR-TKI                                                           | II    | 144 | 2018 |

|      |             |   |                         |                                     |       |     |      |
|------|-------------|---|-------------------------|-------------------------------------|-------|-----|------|
| EGFR | NCT03392246 | O | NSCLC                   | Osimertinib; Selumetinib            | II    | 25  | 2018 |
| EGFR | NCT03396185 | O | A NSCLC (EGFR Mut)      | Icotinib                            | II    | 30  | 2018 |
| EGFR | NCT03410043 | O | NSCLC; R NSCLC; A NSCLC | Osimertinib; Radiation              | II    | 143 | 2018 |
| EGFR | NCT03414814 | O | A NSCLC; M NSCLC        | Osimertinib                         | II    | 28  | 2018 |
| EGFR | NCT03433469 | O | E NSCLC                 | Osimertinib                         | II    | 27  | 2018 |
| EGFR | NCT03434418 | O | NSCLC                   | Osimertinib                         | II    | 37  | 2018 |
| EGFR | NCT03446417 | O | Solid cancer; NSCLC     | ZN-e4                               | I; II | 140 | 2018 |
| EGFR | NCT03455829 | O | Solid cancer; NSCLC; LC | Lerociclib; Osimertinib             | I; II | 30  | 2018 |
| EGFR | NCT03457337 | O | A NSCLC (EGFR Mut)      | Tegafur; Gefitinib; Gefitinib       | II    | 200 | 2018 |
| EGFR | NCT03516214 | O | Bronchial cancer        | Nazartinib; Trametinib              | I     | 24  | 2018 |
| EGFR | NCT03521154 | O | NSCLC                   | Osimertinib                         | III   | 200 | 2018 |
| EGFR | NCT03535363 | O | NSCLC                   | Osimertinib                         | I     | 6   | 2018 |
| EGFR | NCT03567642 | O | LC                      | Osimertinib; Platinum; Etoposide    | I     | 20  | 2018 |
| EGFR | NCT03586453 | O | Solid cancer; NSCLC     | Osimertinib                         | II    | 30  | 2018 |
| EGFR | NCT03599518 | C | NSCLC                   | DS-1205c; Gefitinib                 | I     | 21  | 2018 |
| EGFR | NCT03623750 | O | Solid cancer; NSCLC     | EGFR-TKI; EGF-PTI; Cyclophosphamide | I; II | 30  | 2018 |

|      |             |       |                             |                                          |         |     |      |
|------|-------------|-------|-----------------------------|------------------------------------------|---------|-----|------|
| EGFR | NCT03667820 | O     | NSCLC                       | Osimertinib; Radiation                   | II      | 42  | 2018 |
| EGFR | NCT03727724 | O     | Solid cancer; NSCLC         | Afatinib; Cetuximab                      | II      | 37  | 2018 |
| EGFR | NCT03749213 | O     | NSCLC (EGFR Mut)            | Icotinib                                 | II      | 36  | 2018 |
| EGFR | NCT03755102 | O     | LC; M LC (EGFR Mut)         | Dacomitinib; Osimertinib                 | Early-I | 24  | 2018 |
| EGFR | NCT03804580 | O     | LC                          | Osimertinib                              | II      | 100 | 2018 |
| EGFR | NCT04058704 | O     | NSCLC; BM Metastases        | Icotinib; Radiation                      | III     | 296 | 2018 |
| EGFR | NCT03497767 | O     | M NSCLC                     | Osimertinib; Radiation                   | II      | 80  | 2019 |
| EGFR | NCT03727867 | O; NR | A NSCLC                     | EGFR-TKI; Radiation                      | III     | 300 | 2019 |
| EGFR | NCT03769103 | O     | A NSCLC; M NSCLC (BM)       | Osimertinib; Radiation                   | II      | 76  | 2019 |
| EGFR | NCT03787992 | O     | A NSCLC; M NSCLC (EGFR Mut) | Alflutinib; Gefitinib                    | III     | 358 | 2019 |
| EGFR | NCT03807778 | O     | NSCLC                       | Mobocertinib                             | I       | 33  | 2019 |
| EGFR | NCT03812809 | O     | NSCLC                       | BPI-7711                                 | II      | 226 | 2019 |
| EGFR | NCT03831932 | O     | A NSCLC; M NSCLC            | Osimertinib; Telaglenastat hydrochloride | I       | 18  | 2019 |
| EGFR | NCT03849768 | O     | NSCLC                       | Aumolertinib; Gefitinib                  | III     | 350 | 2019 |
| EGFR | NCT03853551 | C     | NSCLC                       | Osimertinib                              | IV      | 60  | 2019 |
| EGFR | NCT03856697 | O; NR | A NSCLC                     | Abivertinib; Gefitinib                   | III     | 406 | 2019 |
| EGFR | NCT03904823 | O; NR | NSCLC (EGFR Mut)            | Famitinib;Aumolertinib                   | II      | 58  | 2019 |

|      |             |       |                                                 |                                                     |         |     |      |
|------|-------------|-------|-------------------------------------------------|-----------------------------------------------------|---------|-----|------|
| EGFR | NCT03909334 | O     | A NSCLC; M NSCLC<br>(EGFR Mut)                  | Osimertinib; Ramucirumab                            | II      | 150 | 2019 |
| EGFR | NCT03974022 | O     | NSCLC                                           | DZD9008                                             | I; II   | 220 | 2019 |
| EGFR | NCT03983811 | O; NR | Solid cancer; NSCLC                             | Icotinib; Chemotherapy                              | NA      | 174 | 2019 |
| EGFR | NCT04001777 | O     | NSCLC (EGFR Mut)                                | Palcitoclax; Osimertinib                            | I       | 60  | 2019 |
| EGFR | NCT04028778 | O     | LC; NSCLC                                       | Gefitinib; Anlotinib                                | III     | 310 | 2019 |
| EGFR | NCT04035486 | O     | NSCLC                                           | Osimertinib; Pemetrexed;<br>Carboplatin; Cisplatin  | III     | 586 | 2019 |
| EGFR | NCT04036682 | O     | NSCLC (EGFR Exon<br>20 Mut)                     | CLN-081                                             | I; II   | 80  | 2019 |
| EGFR | NCT04063462 | O; NR | NSCLC                                           | Pyrotinib                                           | II      | 60  | 2019 |
| EGFR | NCT04075396 | O     | Solid cancer; NSCLC                             | Lazertinib                                          | I; II   | 28  | 2019 |
| EGFR | NCT04143607 | O     | A NSCLC; M NSCLC                                | ASK120067; Gefitinib                                | III     | 334 | 2019 |
| EGFR | NCT04206072 | O     | NSCLC (EGFR Mut)                                | D-0316; Icotinib                                    | II; III | 362 | 2019 |
| EGFR | NCT03758677 | O; NR | NSCLC                                           | Apatinib                                            | II      | 30  | 2020 |
| EGFR | NCT04129502 | O     | A NSCLC; M NSCLC                                | Mobocertinib; Pemetrexed;<br>Cisplatin; Carboplatin | III     | 318 | 2020 |
| EGFR | NCT04181060 | O     | A Non-SqCC; M<br>Non-SqCC; R Non-<br>SqCC; A LC | Bevacizumab; Osimertinib                            | III     | 300 | 2020 |
| EGFR | NCT04204473 | O     | NSCLC                                           | TY-9591                                             | I       | 126 | 2020 |

|      |             |       |                                         |                                                             |       |     |      |
|------|-------------|-------|-----------------------------------------|-------------------------------------------------------------|-------|-----|------|
| EGFR | NCT04233021 | O     | M NSCLC; M NSCLC (BM); NSCLC (EGFR Mut) | Osimertinib                                                 | II    | 113 | 2020 |
| EGFR | NCT04239833 | O; NR | NSCLC                                   | SH-1028; Gefitinib                                          | III   | 240 | 2020 |
| EGFR | NCT04248829 | O     | NSCLC                                   | Lazertinib; Gefitinib                                       | III   | 380 | 2020 |
| EGFR | NCT04401059 | O     | Solid cancer; NSCLC; ADC                | Elemene; EGFR-TKI                                           | IV    | 468 | 2020 |
| EGFR | NCT04402008 | O     | NSCLC                                   | Poziotinib                                                  | I; II | 76  | 2020 |
| EGFR | NCT04410796 | O     | M NSCLC                                 | Osimertinib; Carboplatin; Pemetrexed                        | II    | 571 | 2020 |
| EGFR | NCT04413201 | O     | Non-SqCC                                | Afatinib; Osimertinib                                       | IV    | 126 | 2020 |
| EGFR | NCT04438902 | O; NR | NSCLC                                   | Osimertinib; Anlotinib                                      | II    | 30  | 2020 |
| EGFR | NCT04448379 | O     | A NSCLC; M NSCLC                        | JMT101                                                      | I     | 48  | 2020 |
| EGFR | NCT04455594 | O; NR | A NSCLC                                 | Almonertinib; Erlotinib; Cisplatin; Carboplatin; Pemetrexed | II    | 168 | 2020 |
| EGFR | NCT04470076 | O; NR | NSCLC (EGFR Mut)                        | Afatinib; Pemetrexed; Gemcitabine; Cisplatin; Carboplatin   | II    | 30  | 2020 |
| EGFR | NCT04479306 | O     | R NSCLC; A NSCLC                        | Alisertib; Osimertinib; Sapanisertib                        | I     | 40  | 2020 |

|      |             |       |                           |                                                        |     |      |      |
|------|-------------|-------|---------------------------|--------------------------------------------------------|-----|------|------|
| EGFR | NCT04487080 | O     | Solid cancer; NSCLC       | Amivantamab; Osimertinib;<br>Lazertinib                | III | 1000 | 2020 |
| EGFR | NCT04500704 | O; NR | NSCLC                     | Almonertinib; Almonertinib;<br>Carboplatin; Pemetrexed | III | 166  | 2020 |
| EGFR | NCT04500717 | O; NR | NSCLC                     | Almonertinib; Almonertinib;<br>Carboplatin; Pemetrexed | III | 460  | 2020 |
| EGFR | NCT04504071 | O     | M NSCLC (EGFR<br>Mut)     | Dacomitinib                                            | II  | 30   | 2020 |
| EGFR | NCT04511533 | O     | M NSCLC                   | Dacomitinib                                            | IV  | 100  | 2020 |
| EGFR | NCT04512430 | O     | NSCLC (EGFR Mut)          | Atezolizumab; Bevacizumab;<br>Carboplatin; Pemetrexed  | II  | 26   | 2020 |
| EGFR | NCT04545710 | O     | LC                        | Abemaciclib; Osimertinib                               | II  | 18   | 2020 |
| EGFR | NCT04552613 | O     | NSCLC (EGFR Mut)          | EGFR-TKI; Pemetrexed;<br>Carboplatin                   | NA  | 110  | 2020 |
| EGFR | NCT04553887 | O; NR | NSCLC                     | Almonertinib                                           | II  | 53   | 2020 |
| EGFR | NCT04563871 | O     | NSCLC                     | Osimertinib                                            | II  | 80   | 2020 |
| EGFR | NCT04592666 | O; NR | LC; NSCLC (EGFR<br>Mut)   | Almonertinib;Pemetrexed;Carb<br>oplatin                | II  | 226  | 2020 |
| EGFR | NCT04622072 | O     | NSCLC                     | XZP-5809-TT1                                           | I   | 90   | 2020 |
| EGFR | NCT04643847 | O; NR | M NSCLC (BM;<br>EGFR Mut) | Almonertinib                                           | II  | 47   | 2020 |

|      |             |       |                              |                                          |       |     |      |
|------|-------------|-------|------------------------------|------------------------------------------|-------|-----|------|
| EGFR | NCT04646824 | O     | M NSCLC                      | Almonertinib Pemetrexed;<br>Cisplatin    | II    | 10  | 2020 |
| EGFR | NCT04811001 | O     | NSCLC                        | Osimertinib; Dacomitinib                 | II    | 170 | 2020 |
| EGFR | NCT04838548 | O     | Solid cancer; NSCLC          | MRG003                                   | II    | 90  | 2020 |
| EGFR | NCT04858958 | O     | NSCLC                        | Furmonertinib                            | I     | 30  | 2020 |
| EGFR | NCT03866499 | O     | NSCLC                        | BPI-7711; Gefitinib                      | III   | 294 | 2021 |
| EGFR | NCT04285671 | O     | M NSCLC; R<br>NSCLC; A NSCLC | Necitumumab; Osimertinib;<br>Trastuzumab | I; II | 26  | 2021 |
| EGFR | NCT04486833 | O; NR | Solid cancer; NSCLC          | Quaratusugene ozeplasmid;<br>Osimertinib | I; II | 100 | 2021 |
| EGFR | NCT04671303 | O; NR | LC                           | Anlotinib; Allitinib                     | II    | 36  | 2021 |
| EGFR | NCT04676477 | O     | NSCLC                        | Patritumab; Deruxtecan;<br>Osimertinib   | I     | 252 | 2021 |
| EGFR | NCT04685070 | O; NR | A ADC                        | Almonertinib                             | II    | 56  | 2021 |
| EGFR | NCT04687241 | O; NR | NSCLC                        | Almonertinib                             | III   | 192 | 2021 |
| EGFR | NCT04695925 | O; NR | NSCLC (EGFR Mut)             | Osimertinib; Pemetrexed;<br>Carboplatin  | III   | 291 | 2021 |
| EGFR | NCT04755738 | O; NR | A NSCLC                      | Almonertinib                             | II    | 234 | 2021 |
| EGFR | NCT04762199 | O     | A NSCLC; M NSCLC             | MRX-2843; Osimertinib                    | I     | 69  | 2021 |
| EGFR | NCT04762459 | O; NR | NSCLC                        | Almonertinib; Pemetrexed;<br>Cisplatin   | III   | 606 | 2021 |

|            |             |       |                     |                                                                |       |     |      |
|------------|-------------|-------|---------------------|----------------------------------------------------------------|-------|-----|------|
| EGFR       | NCT04778800 | O; NR | NSCLC; M NSCLC (BM) | Almonertinib; Chemotherapy                                     | NA    | 60  | 2021 |
| EGFR       | NCT04780568 | O; NR | M NSCLC; A NSCLC    | Osimertinib; Tegavivint                                        | I     | 18  | 2021 |
| EGFR       | NCT04797806 | O     | NSCLC               | Anlotinib; Icotinib                                            | III   | 206 | 2021 |
| EGFR       | NCT04808752 | O; NR | LC                  | Almonertinib                                                   | II    | 60  | 2021 |
| EGFR       | NCT04833205 | O     | M LC (BM)           | Nimotuzumab                                                    | II    | 30  | 2021 |
| EGFR       | NCT04870190 | O; NR | NSCLC               | Almonertinib; Osimertinib                                      | III   | 232 | 2021 |
| EGFR       | NCT04882345 | O; NR | LC (EGFR Mut)       | Almonertinib                                                   | II    | 40  | 2021 |
| EGFR       | NCT04922138 | O; NR | LC                  | Aumolertinib                                                   | II    | 52  | 2021 |
| EGFR       | NCT04923906 | O; NR | NSCLC               | Aumolertinib                                                   | III   | 624 | 2021 |
| EGFR; KRAS | NCT01859026 | O; NR | LC; NSCLC           | Binimetinib; Erlotinib                                         | I     | 43  | 2013 |
| EGFR; MET  | NCT00854308 | C     | NSCLC               | Erlotinib; Onartuzumab                                         | II    | 137 | 2009 |
| EGFR; MET  | NCT01887886 | C     | Non-SqCC            | Erlotinib; Onartuzumab;                                        | III   | 10  | 2013 |
| EGFR; MET  | NCT01900652 | C     | Cancer; NSCLC       | Emibetuzumab; Erlotinib                                        | II    | 111 | 2013 |
| EGFR; MET  | NCT01911507 | O; NR | R NSCLC             | Capmatinib; Erlotinib                                          | I     | 35  | 2013 |
| EGFR; MET  | NCT01982955 | O; NR | NSCLC               | Tepotinib; Gefitinib;<br>Pemetrexed; Cisplatin;<br>Carboplatin | I; II | 88  | 2013 |
| EGFR; MET  | NCT01897480 | O     | Solid cancer; NSCLC | Emibetuzumab; Erlotinib                                        | II    | 150 | 2013 |
| EGFR; MET  | NCT02031744 | C     | NSCLC               | Erlotinib; Onartuzumab                                         | III   | 530 | 2014 |
| EGFR; MET  | NCT02335944 | C     | NSCLC               | Capmatinib; Nazartinib                                         | I; II | 177 | 2015 |

|                    |             |       |                                            |                                                                   |       |     |      |
|--------------------|-------------|-------|--------------------------------------------|-------------------------------------------------------------------|-------|-----|------|
| EGFR; MET          | NCT02609776 | O     | NSCLC                                      | Amivantamab; Lazertinib;<br>Carboplatin; Pemetrexed               | I     | 460 | 2016 |
| EGFR; MET          | NCT03758287 | O     | NSCLC                                      | CT053PTSA; Gefitinib                                              | I; II | 158 | 2016 |
| EGFR; MET          | NCT03778229 | O     | Cancer; NSCLC                              | Osimertinib; Savolitinib                                          | II    | 259 | 2019 |
| EGFR; MET          | NCT03940703 | O     | NSCLC                                      | Tepotinib; Osimertinib                                            | II    | 120 | 2019 |
| EGFR; MET          | NCT04338243 | O     | NSCLC (EGFR<br>T790M-negative;<br>MET Mut) | Glumetinib                                                        | I; II | 70  | 2019 |
| EGFR; MET          | NCT04606771 | O     | NSCLC                                      | Osimertinib; Savolitinib                                          | II    | 56  | 2020 |
| EGFR; MET          | NCT04743505 | O; NR | M NSCLC                                    | APL-101; Osimertinib                                              | I; II | 22  | 2021 |
| EGFR; MET          | NCT04816214 | O; NR | Cancer; NSCLC                              | Capmatinib; Pemetrexed;<br>Cisplatin; Carboplatin;<br>Osimertinib | III   | 245 | 2021 |
| EGFR; MET;<br>PI3K | NCT01121575 | C     | NSCLC                                      | Crizotinib; Dacomitinib                                           | I     | 70  | 2010 |
| EGFR; PI3K         | NCT01487265 | C     | NSCLC                                      | Buparlisib; Erlotinib                                             | II    | 37  | 2014 |
| KRAS               | NCT01395758 | C     | M NSCLC                                    | Tivantinib; Erlotinib;<br>Pemetrexed; Docetaxel;<br>Gemcitabine   | II    | 96  | 2011 |
| KRAS               | NCT01427946 | C     | NSCLC                                      | Retaspimycin hydrochloride;<br>Everolimus                         | I; II | 47  | 2011 |
| KRAS               | NCT02047344 | C     | A NSCLC                                    | Antroquinonol                                                     | II    | 31  | 2013 |

|      |             |      |                                                |                                       |       |     |      |
|------|-------------|------|------------------------------------------------|---------------------------------------|-------|-----|------|
| KRAS | NCT02283320 | C    | NSCLC; SqCC<br>(KRAS Mut)                      | BIND-014 (Docetaxel<br>nanoparticles) | II    | 69  | 2014 |
| KRAS | NCT02642042 | O    | R NSCLC; A NSCLC<br>(KRAS Mut)                 | Docetaxel; Trametinib                 | II    | 60  | 2016 |
| KRAS | NCT02964689 | O    | A NSCLC (KRAS<br>Mut)                          | Binimetinib; Pemetrexed;<br>Cisplatin | I     | 18  | 2017 |
| KRAS | NCT03170206 | O    | LC                                             | Binimetinib; Palbociclib              | I; II | 72  | 2017 |
| KRAS | NCT03095612 | O    | NSCLC                                          | Selinexor                             | I; II | 59  | 2018 |
| KRAS | NCT03520842 | O    | R NSCLC; A<br>NSCLC; M NSCLC<br>(BM; KRAS Mut) | Methotrexate; Regorafenib             | II    | 18  | 2018 |
| KRAS | NCT03681483 | O    | A NSCLC                                        | RO5126766                             | I     | 15  | 2018 |
| KRAS | NCT03704688 | O    | NSCLC (KRAS Mut)                               | Trametinib; Ponatinib                 | I; II | 12  | 2018 |
| KRAS | NCT03808558 | O    | NSCLC (KRAS Mut)                               | TVB-2640                              | II    | 12  | 2019 |
| KRAS | NCT04303780 | O    | A NSCLC; M NSCLC<br>(KRAS G12C)                | AMG 510; Docetaxel                    | III   | 345 | 2020 |
| KRAS | NCT04620330 | O    | NSCLC (KRAS Mut)                               | VS-6766; Defactinib                   | II    | 100 | 2020 |
| KRAS | NCT03990077 | O NR | NSCLC                                          | HL-085; Docetaxel                     | I     | 27  | 2021 |
| KRAS | NCT04625647 | O NR | ADC; NSCLC; R<br>Non-SqCC; A Non-<br>SqCC      | Sotorasib                             | II    | 116 | 2021 |
| KRAS | NCT04685135 | O    | M NSCLC; A NSCLC                               | Adagrasib; Docetaxel                  | III   | 452 | 2021 |

|           |             |       |                           |                                                                                                                      |       |     |      |
|-----------|-------------|-------|---------------------------|----------------------------------------------------------------------------------------------------------------------|-------|-----|------|
| KRAS      | NCT04735068 | O; NR | NSCLC (KRAS Mut)          | Binimetinib;<br>Hydroxychloroquine                                                                                   | II    | 29  | 2021 |
| KRAS      | NCT04933695 | O; NR | NSCLC                     | Sotorasib                                                                                                            | II    | 170 | 2021 |
| KRAS; RET | NCT01829217 | C     | LC                        | Sunitinib                                                                                                            | II    | 13  | 2013 |
| MET       | NCT01519804 | C     | Non-SqCC                  | Cisplatin; Carboplatin;<br>Onartuzumab; Paclitaxel                                                                   | II    | 108 | 2012 |
| MET       | NCT02435121 | C     | Cancer                    | SAR125844                                                                                                            | II    | 1   | 2015 |
| MET       | NCT02544633 | C     | NSCLC                     | MGCD265                                                                                                              | II    | 68  | 2015 |
| MET       | NCT02750215 | C     | A NSCLC                   | Capmatinib                                                                                                           | II    | 20  | 2016 |
| MET       | NCT02897479 | O     | SCC                       | Savolitinib                                                                                                          | II    | 76  | 2016 |
| MET       | NCT02929290 | C     | NSCLC                     | BPI-9016M                                                                                                            | I     | 77  | 2017 |
| MET       | NCT03539536 | O     | NSCLC                     | Telisotuzumab vedotin                                                                                                | II    | 233 | 2018 |
| MET       | NCT03574753 | O     | R SqCC; A SqCC            | Telisotuzumab vedotin                                                                                                | II    | 28  | 2018 |
| MET       | NCT03693339 | O     | Cancer; M LC (MET<br>Mut) | Capmatinib                                                                                                           | II    | 27  | 2018 |
| MET       | NCT03737994 | O     | A Non-SqCC                | Alectinib; Brigatinib;<br>Carboplatin; Ceritinib;<br>Cisplatin; Crizotinib;<br>Ensartinib; Lorlatinib;<br>Pemetrexed | II    | 660 | 2019 |
| MET       | NCT04077099 | O     | NSCLC                     | REGN5093                                                                                                             | I; II | 111 | 2020 |
| MET       | NCT04258033 | O     | NSCLC                     | Bozitinib                                                                                                            | II    | 185 | 2020 |

|                    |             |       |                                             |                                                     |       |     |      |
|--------------------|-------------|-------|---------------------------------------------|-----------------------------------------------------|-------|-----|------|
| MET                | NCT04398940 | O     | NSCLC                                       | TQ-B3139                                            | II    | 71  | 2020 |
| MET                | NCT04427072 | O     | Solid cancer; NSCLC                         | Capmatinib;Docetaxel                                | III   | 90  | 2020 |
| MET                | NCT04677595 | O     | NSCLC                                       | Capmatinib                                          | II    | 35  | 2021 |
| MET                | NCT04739358 | O; NR | A NSCLC (MET Mut)                           | Tepotinib                                           | I; II | 65  | 2021 |
| MET                | NCT04768296 | O     | SCLC                                        | Berzosertib;Topotecan                               | II    | 86  | 2021 |
| MET                | NCT04923945 | O; NR | M NSCLC                                     | Savolitinib                                         | III   | 163 | 2021 |
| MET                | NCT04926831 | O; NR | NSCLC                                       | Capmatinib                                          | II    | 38  | 2021 |
| MET; NTRK;<br>ROS1 | NCT01639508 | O     | NSCLC                                       | Cabozantinib                                        | II    | 68  | 2012 |
| MET; ROS1          | NCT04084717 | O     | Non-SqCC; A<br>NSCLC (ROS1 Mut;<br>MET Mut) | Crizotinib                                          | II    | 50  | 2019 |
| PI3K               | NCT01493843 | C     | NSCLC                                       | Pictilisib; Bevacizumab;<br>Carboplatin; Paclitaxel | II    | 501 | 2012 |
| RET                | NCT01823068 | C     | NSCLC                                       | Vandetanib                                          | II    | 17  | 2014 |
| RET                | NCT04268550 | O     | R NSCLC; A NSCLC                            | Selpercatinib                                       | II    | 124 | 2020 |
| RET                | NCT04819100 | O; NR | Solid cancer; NSCLC                         | Selpercatinib                                       | III   | 170 | 2021 |
| ROS1               | NCT01945021 | C     | NSCLC (ROS1 Mut)                            | Crizotinib                                          | II    | 129 | 2013 |
| ROS1               | NCT03608007 | O     | LC (ROS1 Mut)                               | Ensartinib                                          | II    | 69  | 2018 |
| ROS1               | NCT03612154 | O     | NSCLC                                       | Lorlatinib                                          | II    | 35  | 2019 |
| ROS1               | NCT03972189 | O     | NSCLC (ROS1 Mut)                            | TQ-B3101                                            | II    | 111 | 2019 |

|      |             |       |                     |                         |     |     |      |
|------|-------------|-------|---------------------|-------------------------|-----|-----|------|
| ROS1 | NCT04395677 | O     | NSCLC               | Taletrectinib           | II  | 106 | 2020 |
| ROS1 | NCT04603807 | O; NR | Solid cancer; NSCLC | Entrectinib; Crizotinib | III | 220 | 2021 |
| ROS1 | NCT04621188 | O     | M NSCLC             | Lorlatinib              | II  | 84  | 2021 |
| ROS1 | NCT04919811 | O; NR | NSCLC               | Taletrectinib           | II  | 119 | 2021 |

*Abbreviations:* **C**, Closed; **O**, Open; **NR**, Not Recruiting; **NA**, Not Associated; **A**, Advanced; **M**, Metastatic; **R**, Recurrent; **SCLC**, Small Cell Lung Cancer; **LC**, Lung Cancer; **ADC**, Adenocarcinoma; **NSCLC**, Non Small Cell Lung Cancer; **SqCC**, Squamous Carcinoma; **SCC**, Sarcomatous Carcinoma.
